# Supplementary material
Source: Springer Nature journal article supplement (https://www.springermedizin.de/resource/supplementary/12913_2007_462_MOESM4_ESM.pdf/9534800)
Supplement: MOESM4 [file 9534800]

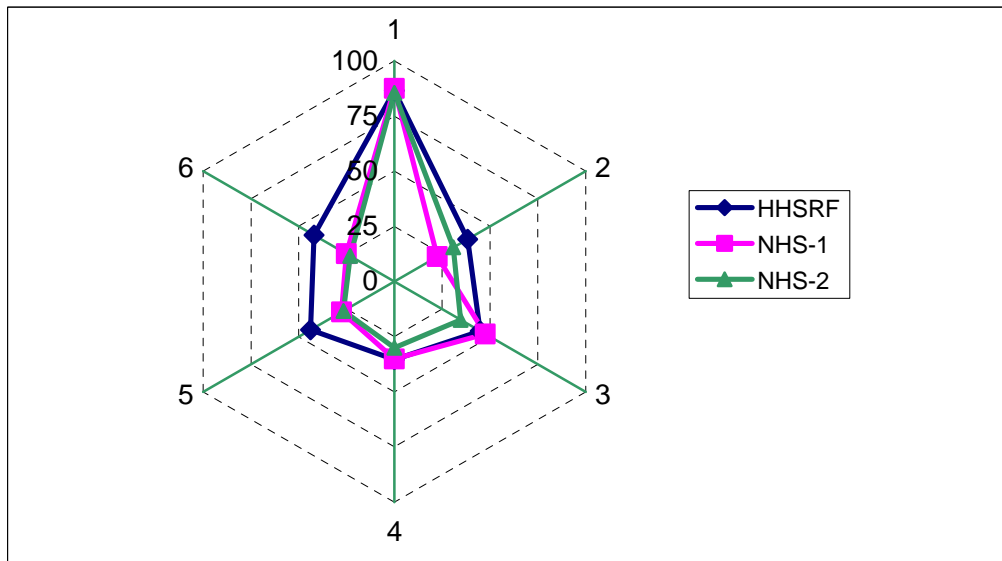

|                                                      |                                                                         |
|------------------------------------------------------|-------------------------------------------------------------------------|
| 1. Percentage of projects with publications          | 2. Percentage of projects led to postgraduate qualifications/ promotion |
| 3. Percentage of projects led to subsequent research | 4. Percentage of projects led to policy change                          |
| 5. Percentage of projects led to practice change     | 6. Percentage of projects led to health service benefits                |
